# Supplementary material for: Identification of Immune-Related lncRNA Regulatory Network in Pulpitis
Source: Hindawi journal article supplement (doi:10.1155/2022/7222092), 2022-06-06

**A**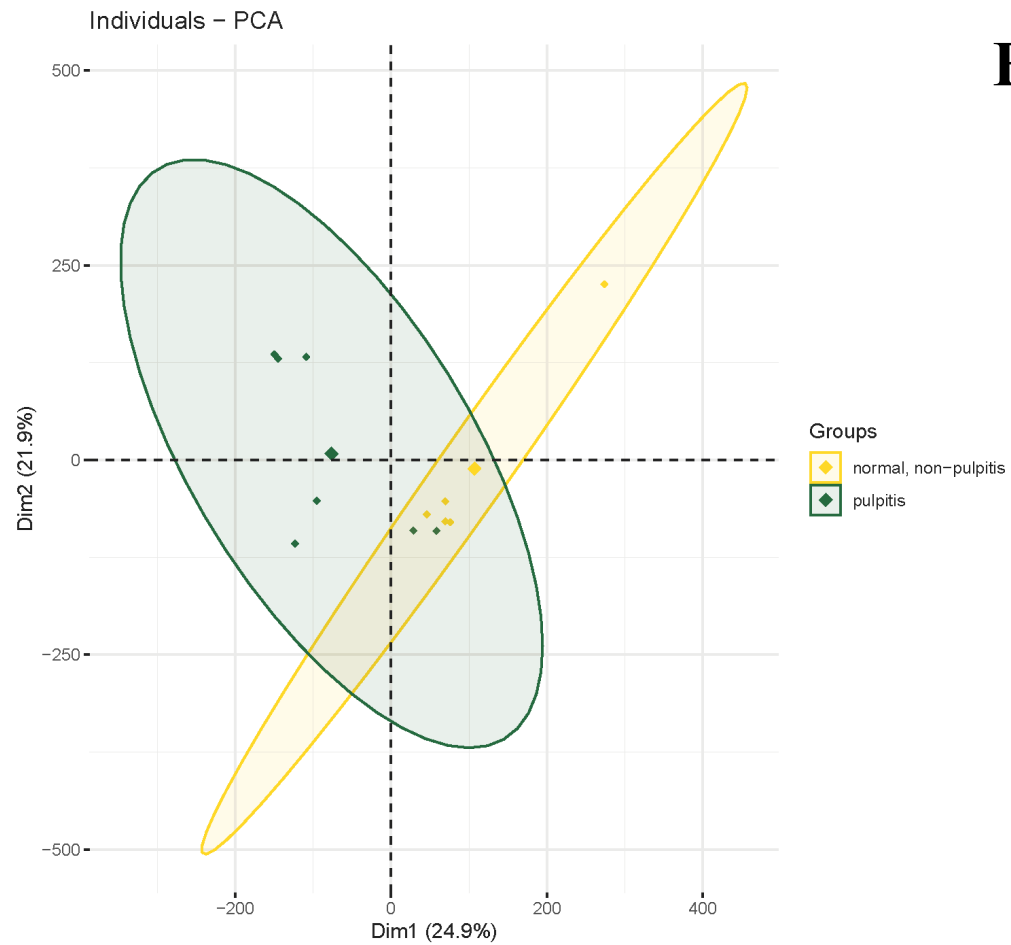**B**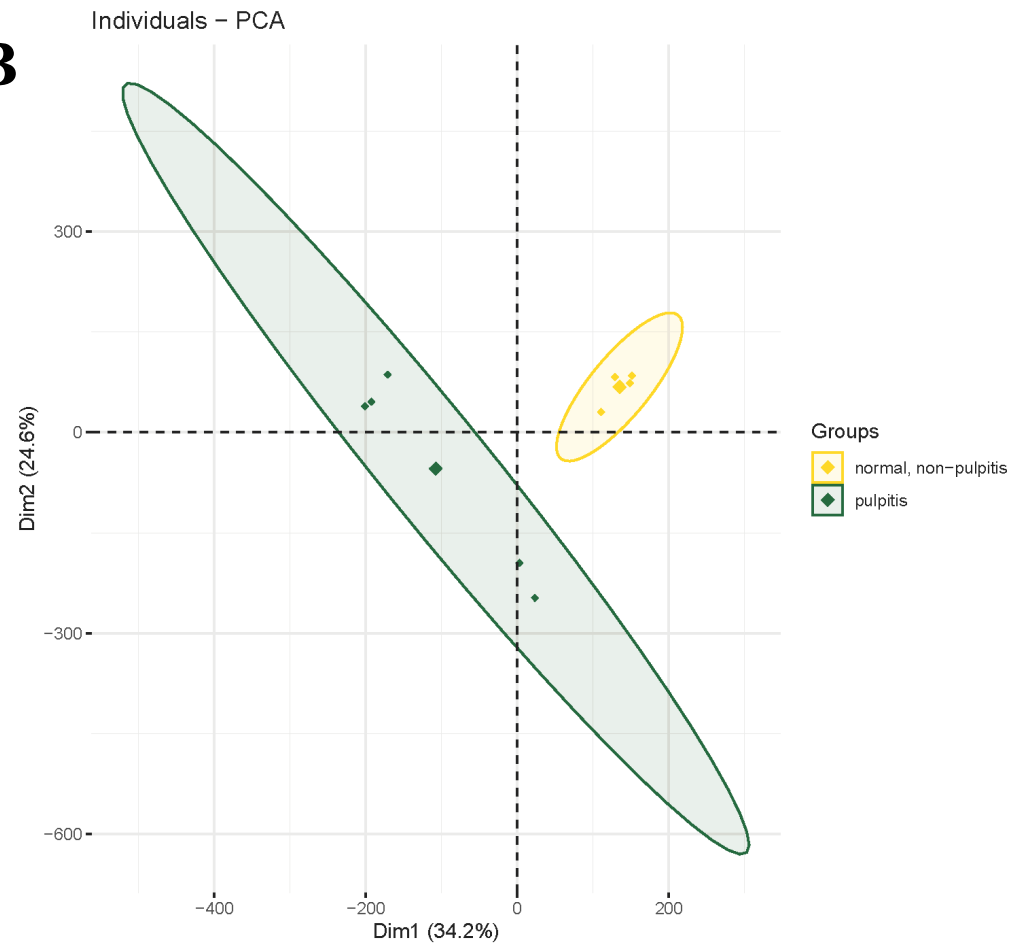

Supplement: f2 [file 7222092.f2.pdf]
