# Supplementary material for: Identification of Immune-Related lncRNA Regulatory Network in Pulpitis
Source: Hindawi journal article supplement (doi:10.1155/2022/7222092), 2022-06-06

Subgroup of pulpitis\_mRNA

A

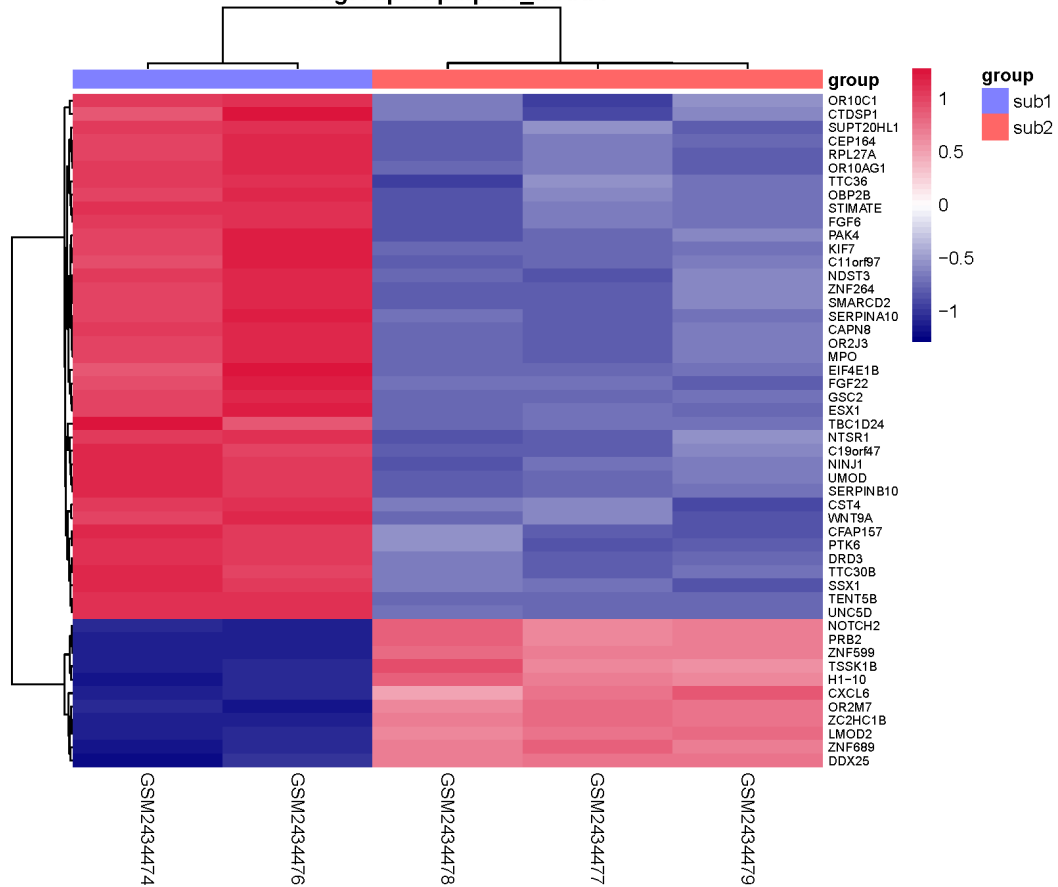

Subgroup of pulpitis\_lncRNA

B

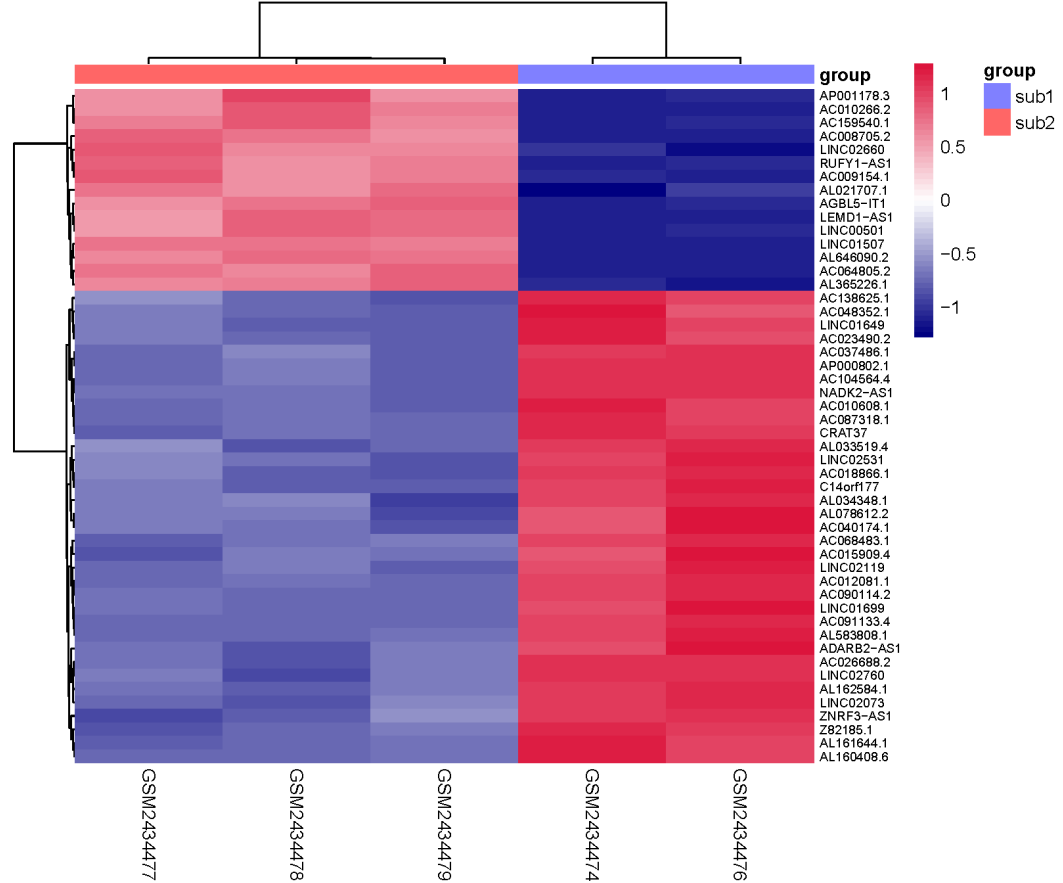

Supplement: f4 [file 7222092.f4.pdf]
