# Supplementary material for: Identification of Immune-Related lncRNA Regulatory Network in Pulpitis
Source: Hindawi journal article supplement (doi:10.1155/2022/7222092), 2022-06-06
Supplement: f5 [file 7222092.f5.pdf]

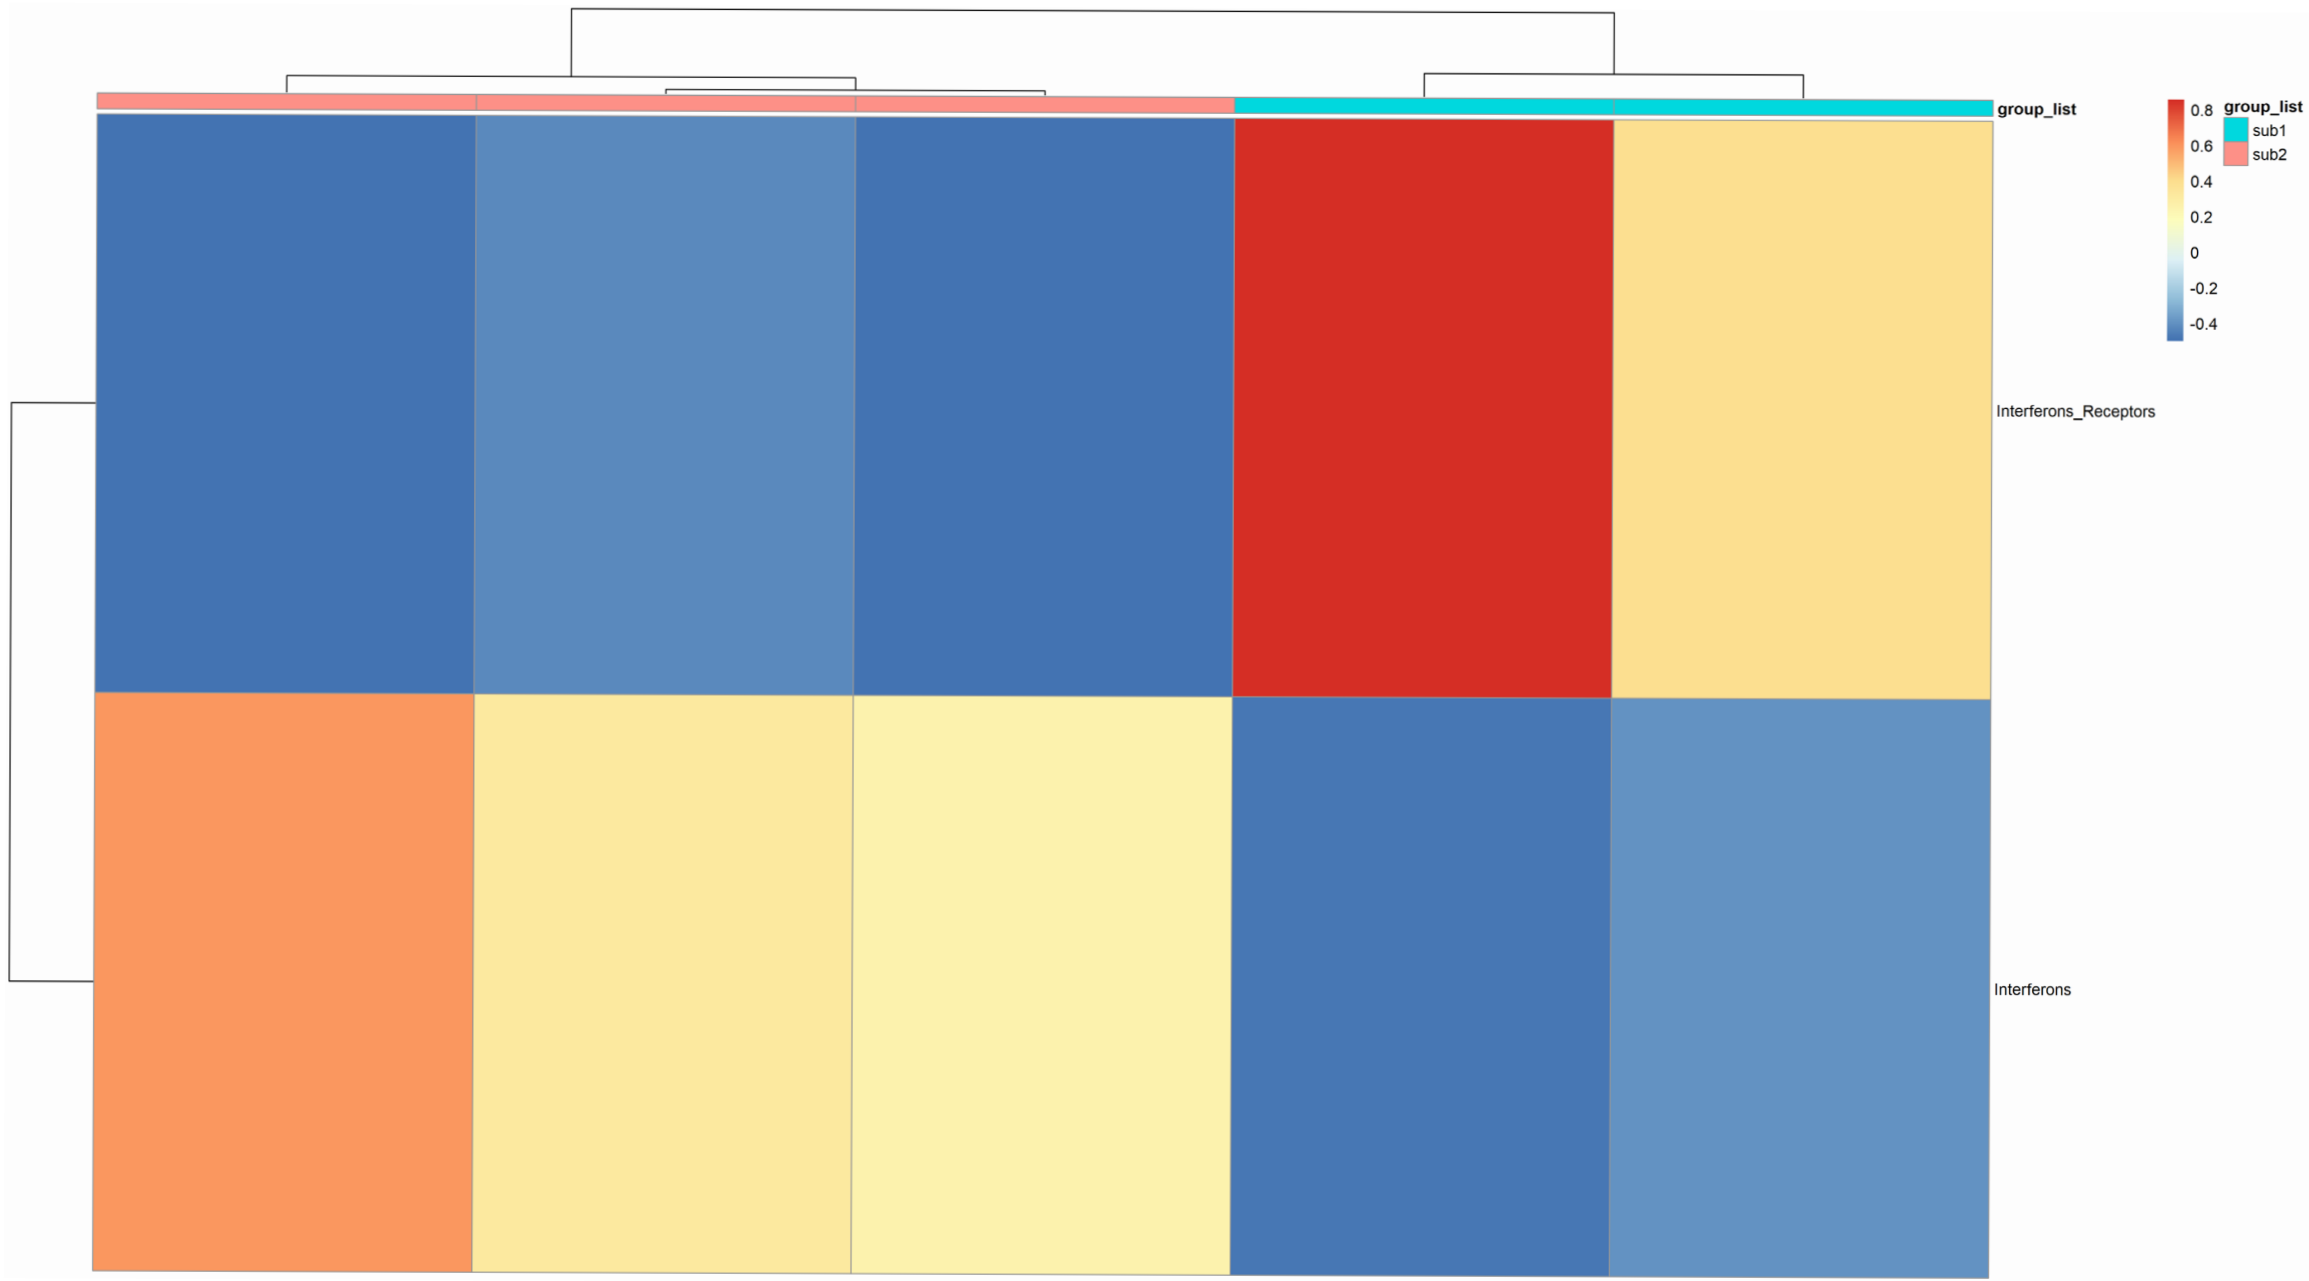

group\_list

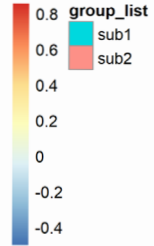

sub1  
sub2

Interferons\_Receptors

Interferons
